# Supplementary material for: Spatial Distribution and Driving Factors of Old and Notable Trees in a Fast-Developing City, Northeast China
Source: MDPI journal article supplement (doi:10.3390/su14137937), 2022-06-29
Supplement: s1 [file s1]

**Table S1.** The main districts in Changchun: Land area, green cover, population and development year

| District                                               | Abbreviation | Land area<br>(km <sup>2</sup> )<br>a | Green cover<br>(%) b | Population<br>(‘1000) c | Development<br>years |
|--------------------------------------------------------|--------------|--------------------------------------|----------------------|-------------------------|----------------------|
| Chaoyang District                                      | CYD          | 72.13                                | 44.9                 | 690.8                   | 1931                 |
| Changchun New Area                                     | CNA          | 73.16                                | 40.0                 | 388.2                   | 1991                 |
| Nanguan District                                       | NGD          | 80.74                                | 47.0                 | 666.4                   | 1948                 |
| Kuancheng District                                     | KCD          | 91.79                                | 38.6                 | 426.3                   | 1910                 |
| Lvyuan District                                        | LYD          | 88.74                                | 44.4                 | 618.7                   | 1995                 |
| Automobile Economic and Technological Development Zone | ADZ          | 23.04                                | 35.0                 | 223.0                   | 1953                 |
| Jingyue High-tech Industrial Development Zone          | JDZ          | 22.46                                | 45.0                 | 338.6                   | 1995                 |
| Erdao District                                         | EDD          | 60.14                                | 42.0                 | 428.0                   | 1910                 |
| Lianhuashan Eco-tourism Resort                         | LER          | 6.52                                 | 33.2                 | 5.1                     | 2008                 |

**Note:** <sup>a</sup> Source of data: Changchun Municipal Planning and Natural Resources Bureau (2021), <sup>b</sup> Source of data: Changchun Garden Administration Bureau (2021), <sup>c</sup> Source of data: Changchun Municipal Statistics Bureau (2021).

**Table S2.** The six tree-habitats which accommodate ONTs in Changchun

| Type of green space   | Abbreviation | Tree-habitats                                                                                                                                                           |
|-----------------------|--------------|-------------------------------------------------------------------------------------------------------------------------------------------------------------------------|
| Park Green Spaces     | PGS          | Comprehensive park, neighborhood park, theme park and petty street garden                                                                                               |
| Road Green Spaces     | RGS          | Green spaces attached to various kinds of urban roads and streets                                                                                                       |
| Square Green Spaces   | SGS          | All kinds of city square green spaces                                                                                                                                   |
| Attach Green Spaces   | AGS          | Refers to the green space attached to government agencies, institutions, hospitals, hotels and public service facilities, schools, colleges, universities and factories |
| Regional Green Spaces | EGS          | Refers to landscape recreation green space, ecological conservation green space, regional facility protection green space, and production green space                   |
| Other Green Spaces    | OGS          | Others (including temples, cemeteries, rural areas and other places that cannot be classified)                                                                          |

**Table S3.** Classification for growth potential of Old and Notable Trees (State Forestry Administration,2016)

| Growth level | Tree leaves                       | Tree twig                                            | Tree trunk                                                 |
|--------------|-----------------------------------|------------------------------------------------------|------------------------------------------------------------|
| Normal       | Normal leaves are more than95%.   | The number of new twigs is large, without dead twigs | The trunk is intact without necrosis                       |
| Weak         | Normal leaf accounts for 70%-95%. | A few of the twigs are dead                          | There are minor injuries or a little necrosis in the trunk |
| Heavy weak   | Normal leaf accounts for20%-69%.  | There are few new twigs and many                     | There are some necrosis or hollows in the trunk            |

|            |                                  |                                            |                                                 |
|------------|----------------------------------|--------------------------------------------|-------------------------------------------------|
| Endangered | Normal leaves are less than 20%. | dead twigs<br>There are many dead branches | The trunk is necrotic, with dry rot and hollows |
|------------|----------------------------------|--------------------------------------------|-------------------------------------------------|

**Table S4.** Old and Notable Tree species list of Changchun city

| Species name                                                         | Tree count (no) | IV (%) | Mean DBH (cm) | Mean basal area (m <sup>2</sup> ) | Mean crown cover (m <sup>2</sup> ) | Mean height (m) | Mean age (Years) |
|----------------------------------------------------------------------|-----------------|--------|---------------|-----------------------------------|------------------------------------|-----------------|------------------|
| <i>Pinus tabulaeformis</i> var. <i>mukdensis</i>                     | 11              | 1.19   | 66.8          | 0.35                              | 107.5                              | 15.7            | 108              |
| <i>Abies nephrolepis</i>                                             | 1               | 0.09   | 53.5          | 0.23                              | 47.8                               | 19.0            | 100              |
| <i>Fraxinus mandshurica</i>                                          | 1               | 0.12   | 46.0          | 0.45                              | 176.6                              | 19.0            | 108              |
| <i>Phellodendron amurense</i>                                        | 2               | 0.23   | 71.5          | 0.41                              | 160.5                              | 18.2            | 101              |
| <i>Ulmus pumila</i>                                                  | 32              | 4.68   | 91.5          | 0.66                              | 153.9                              | 17.9            | 154              |
| <i>Picea koraiensis</i>                                              | 3               | 0.29   | 60.5          | 0.27                              | 63.6                               | 18.8            | 101              |
| <i>Salix matsudana</i>                                               | 61              | 9.58   | 97.3          | 0.74                              | 116.8                              | 17.6            | 136              |
| <i>Pinus koraiensis</i>                                              | 2               | 0.18   | 51.2          | 0.20                              | 58.1                               | 14.2            | 170              |
| <i>Maackia amurensis</i>                                             | 3               | 0.34   | 71.0          | 0.40                              | 33.2                               | 17.7            | 119              |
| <i>Prunus sibirica</i>                                               | 11              | 1.18   | 66.4          | 0.35                              | 72.4                               | 11.8            | 111              |
| <i>Malus baccata</i>                                                 | 6               | 0.58   | 56.9          | 0.26                              | 724                                | 12.3            | 106              |
| <i>Tilia amurensis</i>                                               | 1               | 0.12   | 78.0          | 0.48                              | 103.8                              | 19.6            | 140              |
| <i>Salix babylonica</i>                                              | 1               | 0.18   | 110.0         | 0.95                              | 78.5                               | 16.5            | 100              |
| <i>Prunus padus</i>                                                  | 2               | 0.25   | 80.0          | 0.51                              | 50.2                               | 11.0            | 102              |
| <i>Quercus mongolica</i>                                             | 9               | 1.04   | 72.0          | 0.41                              | 107.5                              | 14.3            | 156              |
| <i>Taxus cuspidata</i>                                               | 6               | 0.41   | 20.8          | 0.19                              | 43.0                               | 10.7            | 195              |
| <i>Juglans mandshurica</i>                                           | 3               | 0.34   | 70.0          | 0.38                              | 237.7                              | 21.9            | 117              |
| <i>Pyrus ussuriensis</i>                                             | 609             | 77.95  | 80.6          | 0.51                              | 126.6                              | 9.1             | 204              |
| <i>Juniperus rigida</i>                                              | 1               | 0.10   | 54.3          | 0.30                              | 22.9                               | 17.0            | 196              |
| <i>Acer pictum</i>                                                   | 2               | 0.24   | 71.5          | 0.40                              | 208.6                              | 12.5            | 116              |
| <i>Prunus mandshurica</i>                                            | 1               | 0.15   | 58.0          | 0.10                              | 70.9                               | 17.0            | 101              |
| <i>Crataegus pinnatifida</i>                                         | 4               | 0.46   | 72.8          | 0.42                              | 50.2                               | 11.0            | 180              |
| <i>Gleditsia japonica</i>                                            | 1               | 0.11   | 70.0          | 0.39                              | 28.3                               | 9.0             | 117              |
| <i>Morus alba</i>                                                    | 1               | 0.09   | 50.6          | 0.20                              | 120.7                              | 10.8            | 130              |
| <i>Salix matsudana</i> var. <i>matsudana</i> f. <i>umbraculifera</i> | 1               | 0.24   | 132.5         | 1.38                              | 208.6                              | 21.5            | 120              |

**Table S5.** Old and Notable Tree species list of Shenyang city

| Species name                                                   | Tree<br>count<br>(no) | RA<br>(%) | RD<br>(%) | IV<br>(%) | Mean<br>basal<br>area<br>(m <sup>2</sup> ) | Mean<br>crown<br>cover<br>(m <sup>2</sup> ) | Mean<br>height<br>(m) | Mean<br>age<br>(Years) |
|----------------------------------------------------------------|-----------------------|-----------|-----------|-----------|--------------------------------------------|---------------------------------------------|-----------------------|------------------------|
| <i>Ginkgo biloba</i>                                           | 21                    | 0.70      | 0.41      | 0.56      | 5.09                                       | 78.5                                        | 18.6                  | 109                    |
| <i>Abies holophylla</i>                                        | 2                     | 0.07      | 0.01      | 0.04      | 0.1                                        | 41.8                                        | 20.5                  | 50                     |
| <i>Pinus tabulaeformis</i>                                     | 2807                  | 94.23     | 94.78     | 94.5      | 1171.8                                     | 84.9                                        | 13.0                  | 267                    |
| <i>Pinus banksiana</i>                                         | 1                     | 0.03      | 0.01      | 0.02      | 0.08                                       | 38.5                                        | 6.0                   | 110                    |
| <i>Juniperus chinensis</i>                                     | 1                     | 0.03      | 0.01      | 0.02      | 0.09                                       | 6.2                                         | 10.0                  | 210                    |
| <i>Platycladus orientalis</i>                                  | 1                     | 0.03      | 0.01      | 0.02      | 0.08                                       | 28.3                                        | 9.0                   | 115                    |
| <i>Taxus cuspidata</i> var.<br><i>nana</i>                     | 2                     | 0.07      | 0.01      | 0.04      | 0.15                                       | 9.6                                         | 6.0                   | 120                    |
| <i>Quercus liaotungensis</i>                                   | 4                     | 0.13      | 0.24      | 0.18      | 2.91                                       | 132.7                                       | 12.2                  | 220                    |
| <i>Quercus acutissima</i>                                      | 1                     | 0.03      | 0.01      | 0.02      | 0.07                                       | 153.9                                       | 13.0                  | 120                    |
| <i>Salix matsudana</i>                                         | 9                     | 0.30      | 0.09      | 0.2       | 1.09                                       | 120.7                                       | 12.0                  | 148                    |
| <i>Salix matsudana</i><br>f. <i>pendula</i>                    | 3                     | 0.10      | 0.08      | 0.09      | 1.04                                       | 132.7                                       | 13.5                  | 122                    |
| <i>Ulmus pumila</i>                                            | 60                    | 2.01      | 3.16      | 2.59      | 39.12                                      | 132.7                                       | 14.2                  | 215                    |
| <i>Celtis koraiensis</i>                                       | 3                     | 0.10      | 0.06      | 0.08      | 0.71                                       | 33.2                                        | 13.2                  | 120                    |
| <i>Celtis bungeana</i>                                         | 8                     | 0.27      | 0.23      | 0.25      | 2.9                                        | 113.0                                       | 13.6                  | 135                    |
| <i>Pyrus ussuriensis</i>                                       | 1                     | 0.03      | 0.02      | 0.03      | 0.3                                        | 70.8                                        | 11.0                  | 120                    |
| <i>Prunus sargentii</i>                                        | 20                    | 0.67      | 0.09      | 0.38      | 1.15                                       | 28.3                                        | 7.5                   | 53                     |
| <i>Cerasus yedoensis</i>                                       | 1                     | 0.03      | 0.00      | 0.02      | 0.05                                       | 19.6                                        | 7.0                   | 44                     |
| <i>Sophora japonica</i>                                        | 4                     | 0.13      | 0.13      | 0.13      | 1.64                                       | 116.8                                       | 19.8                  | 110                    |
| <i>Morus alba</i>                                              | 4                     | 0.13      | 0.15      | 0.14      | 1.87                                       | 126.6                                       | 13.2                  | 134                    |
| <i>Euonymus bungeanus</i>                                      | 5                     | 0.17      | 0.15      | 0.16      | 1.82                                       | 132.7                                       | 11.9                  | 121                    |
| <i>Phellodendron</i><br><i>amurense</i>                        | 2                     | 0.07      | 0.16      | 0.11      | 1.99                                       | 91.6                                        | 12.7                  | 140                    |
| <i>Fraxinus americana</i>                                      | 1                     | 0.03      | 0.05      | 0.04      | 0.62                                       | 201.0                                       | 19.0                  | 110                    |
| <i>Acer truncatum</i>                                          | 1                     | 0.03      | 0.01      | 0.02      | 0.15                                       | 113.0                                       | 16.5                  | 120                    |
| <i>Syringa</i><br><i>reticulata</i> subsp.<br><i>amurensis</i> | 13                    | 0.44      | 0.10      | 0.27      | 1.23                                       | 67.9                                        | 14.5                  | 120                    |
| <i>Ailanthus altissima</i>                                     | 1                     | 0.03      | 0.03      | 0.03      | 0.31                                       | 113.0                                       | 20.5                  | 110                    |
| <i>Magnolia sieboldii</i>                                      | 1                     | 0.03      | 0.00      | 0.02      | 0.03                                       | 9.6                                         | 5.5                   | 44                     |
| <i>Paeonia suffruticosa</i>                                    | 1                     | 0.03      | -         | 0.02      | -                                          | 4.9                                         | 1.7                   | 132                    |
| <i>Rosa rugosa</i>                                             | 1                     | 0.03      | -         | 0.02      | -                                          | 9.6                                         | 2.3                   | 42                     |

**Table S6.** Old and Notable Tree species list of Harbin city

| Species name                                      | Tree count (no) | RA (%) | RD (%) | IV (%) | Mean basal area (m <sup>2</sup> ) | Mean crown cover (m <sup>2</sup> ) | Mean height (m) | Mean age (Years) |
|---------------------------------------------------|-----------------|--------|--------|--------|-----------------------------------|------------------------------------|-----------------|------------------|
| <i>Ulmus pumila</i>                               | 960             | 690.65 | 637.92 | 664.28 | 511.68                            | 232.23                             | 20.6            | 135              |
| <i>Populus nigra</i> var. <i>italica</i>          | 16              | 11.51  | 54.41  | 32.96  | 43.64                             | 254.34                             | 24.2            | 110              |
| <i>Malus baccata</i>                              | 2               | 1.44   | 0.79   | 1.11   | 0.63                              | 171.95                             | 12.5            | 105              |
| <i>Syringa reticulata</i> subsp. <i>amurensis</i> | 3               | 2.16   | 0.27   | 1.21   | 0.21                              | 86.55                              | 7.6             | 100              |
| <i>Fraxinus mandshurica</i>                       | 7               | 10.45  | 7.40   | 8.92   | 3.12                              | 167.33                             | 18.6            | 112              |
| <i>Phellodendron amurense</i>                     | 15              | 22.39  | 13.20  | 17.80  | 5.57                              | 191.04                             | 15.2            | 108              |
| <i>Pyrus ussuriensis</i>                          | 1               | 1.49   | 12.09  | 6.79   | 5.10                              | 200.96                             | 12.0            | 135              |
| <i>Prunus padus</i>                               | 2               | 2.99   | 3.43   | 3.21   | 1.45                              | 240.41                             | 15.4            | 104              |
| <i>Prunus sibirica</i>                            | 2               | 0.50   | 0.05   | 0.28   | 0.15                              | 30.18                              | 6.4             | 75               |
| <i>Morus alba</i>                                 | 2               | 0.50   | 0.13   | 0.32   | 0.36                              | 216.31                             | 10.5            | 105              |
| <i>Juglans mandshurica</i>                        | 43              | 10.80  | 4.91   | 7.86   | 14.00                             | 191.04                             | 18.0            | 130              |
| <i>Tilia amurensis</i>                            | 2               | 0.50   | 0.29   | 0.40   | 0.82                              | 122.66                             | 18.6            | 142              |
| <i>Pinus tabulaeformis</i>                        | 6               | 3.57   | 1.17   | 2.37   | 1.62                              | 86.55                              | 16.0            | 120              |
| <i>Prunus maackii</i>                             | 1               | 0.60   | 0.35   | 0.47   | 0.48                              | 301.57                             | 20.4            | 110              |
| <i>Larix gmelinii</i>                             | 1               | 0.60   | 0.23   | 0.41   | 0.32                              | 120.70                             | 24.5            | 120              |
| <i>Quercus mongolica</i>                          | 3               | 2.33   | 1.13   | 1.73   | 1.01                              | 120.70                             | 16.8            | 180              |
| <i>Picea koraiensis</i>                           | 3               | 8.82   | 4.35   | 6.59   | 0.93                              | 52.78                              | 17.5            | 110              |
| <i>Populus simonii</i>                            | 3               | 17.65  | 5.74   | 11.70  | 1.01                              | 81.67                              | 17.0            | 120              |

**Table S7.** LSD analysis of diversity index and evenness index of Old and Notable Trees in Changchun, Shenyang and Harbin

| Dependent variable |     |           |           | Mean difference(I-J) | Standard error | Significance | 95%Confidence interval |             |
|--------------------|-----|-----------|-----------|----------------------|----------------|--------------|------------------------|-------------|
|                    |     |           |           |                      |                |              | Lower limit            | Upper limit |
| Species diversity  | LSD | Shenyang  | Harbin    | 0.18625              | 0.32235        | 0.569        | -0.4823                | 0.8548      |
|                    |     |           | Changchun | -0.12125             | 0.31326        | 0.702        | -0.7709                | 0.5284      |
|                    |     | Harbin    | Shenyang  | -0.18625             | 0.32235        | 0.569        | -0.8548                | 0.4823      |
|                    |     |           | Changchun | -0.30750             | 0.31326        | 0.337        | -0.9572                | 0.3422      |
|                    |     | Changchun | Shenyang  | 0.12125              | 0.31326        | 0.702        | -0.5284                | 0.7709      |
|                    |     |           | Harbin    | 0.30750              | 0.31326        | 0.337        | -0.3422                | 0.9572      |
| Species evenness   | LSD | Shenyang  | Harbin    | 0.15500              | 0.17159        | 0.376        | -0.2009                | 0.5109      |
|                    |     |           | Changchun | -0.13208             | 0.16676        | 0.437        | -0.4779                | 0.2138      |
|                    |     | Harbin    | Shenyang  | -0.15500             | 0.17159        | 0.376        | -0.5109                | 0.2009      |
|                    |     |           | Changchun | -0.28708             | 0.16676        | 0.099        | -0.6329                | 0.0588      |

|           |          |         |         |       |         |        |
|-----------|----------|---------|---------|-------|---------|--------|
| Changchun | Shenyang | 0.13208 | 0.16676 | 0.437 | -0.2138 | 0.4779 |
|           | Harbin   | 0.28708 | 0.16676 | 0.099 | -0.0588 | 0.6329 |

---
